# Supplementary material for: Prognostic value of lymphocyte-to-monocyte ratio and neutrophil-to-lymphocyte ratio in follicular lymphoma: a retrospective cohort study
Source: PubMed Central journal article supplement — BMJ Open. 2017 Nov 3;7(11):e017904. doi: 10.1136/bmjopen-2017-017904 (PMC5695484; doi:10.1136/bmjopen-2017-017904), 2017-11-03
Supplement: bmjopen-2017-017904supp002.pdf [file bmjopen-2017-017904supp002.pdf]

**Supplementary Table S1. Follicular Lymphoma International Prognostic Index**

| Parameters   | Definition of risk factors                              |
|--------------|---------------------------------------------------------|
| Nodal sites  | >4 lymph node regions                                   |
| Age          | >60 years                                               |
| Serum marker | Elevated LDH                                            |
| Stage        | Advanced (stages III–IV according to Ann Arbor staging) |
| Haemoglobin  | <12 g/dL                                                |

---

0–1 risk factor: low risk

2 risk factors: intermediate risk

3–5 risk factors: high risk

Abbreviations: LDH, lactate dehydrogenase
