# Supplementary material for: Prognostic value of lymphocyte-to-monocyte ratio and neutrophil-to-lymphocyte ratio in follicular lymphoma: a retrospective cohort study
Source: PubMed Central journal article supplement — BMJ Open. 2017 Nov 3;7(11):e017904. doi: 10.1136/bmjopen-2017-017904 (PMC5695484; doi:10.1136/bmjopen-2017-017904), 2017-11-03
Supplement: bmjopen-2017-017904supp003.pdf [file bmjopen-2017-017904supp003.pdf]

**Supplementary Table S2.** Sensitivity, specificity, positive predictive value, negative predictive value, likelihood ratio positive, likelihood ratio negative, and Youden's index for LMR and NLR

| Cell count ratio |             |             | Positive         | Negative         | Likelihood ratio | Likelihood ratio | Youden's |
|------------------|-------------|-------------|------------------|------------------|------------------|------------------|----------|
| cut-off values   | Sensitivity | Specificity | predictive value | predictive value | positive         | negative         | index    |
| LMR: 3.20        | 61.1%       | 45.7%       | 22.4%            | 82.1%            | 1.1              | 0.9              | 0.60     |
| NLR: 2.18        | 66.7%       | 35.7%       | 21.1%            | 80.6%            | 1.0              | 0.9              | 0.56     |

Abbreviations: LMR, lymphocyte to monocyte ratio; NLR, neutrophil to lymphocyte ratio
