# Supplementary figures and images for: Prognostic value of lymphocyte-to-monocyte ratio and neutrophil-to-lymphocyte ratio in follicular lymphoma: a retrospective cohort study
Source: PubMed Central journal article supplement — BMJ Open. 2017 Nov 3;7(11):e017904. doi: 10.1136/bmjopen-2017-017904 (PMC5695484; doi:10.1136/bmjopen-2017-017904), 2017-11-03

**Supplementary Figure S1. Patient recruitment and follow-up flow diagram**

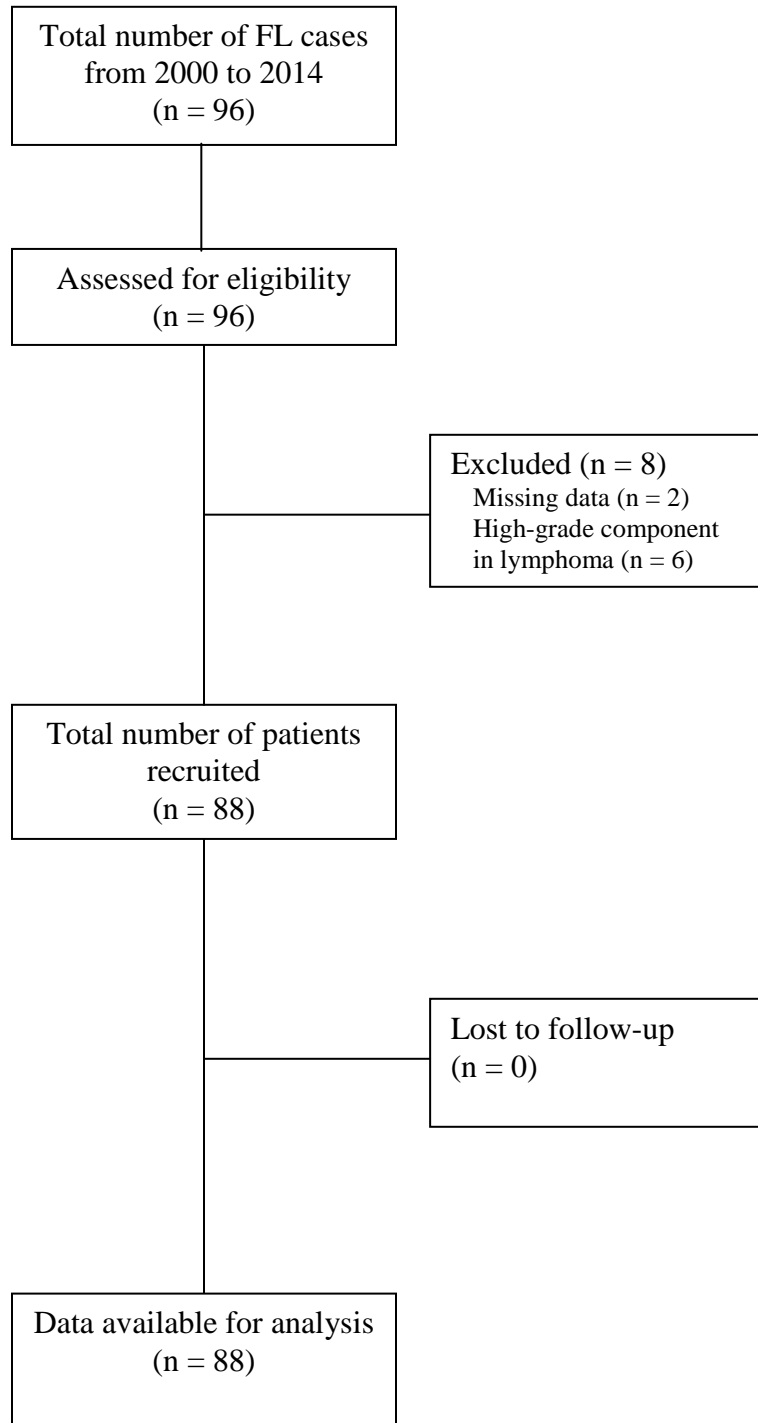

Supplement: bmjopen-2017-017904supp001.pdf [file bmjopen-2017-017904supp001.pdf]
